# Supplementary material
Source: Springer Nature journal article supplement (https://www.springermedizin.de/resource/supplementary/12943_2010_763_MOESM2_ESM.pdf/9554768)

**A**

MGH-U1

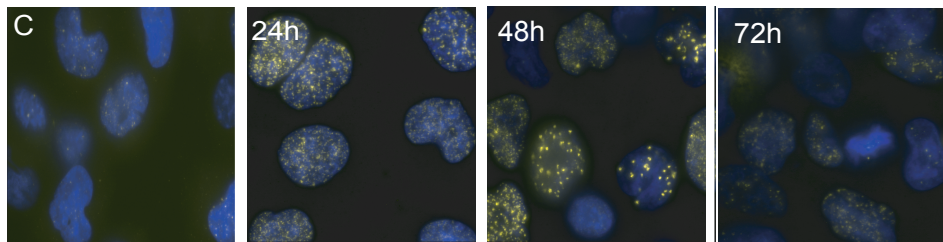

833K

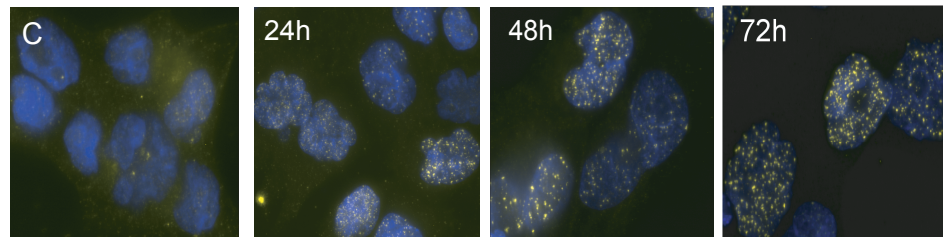**B**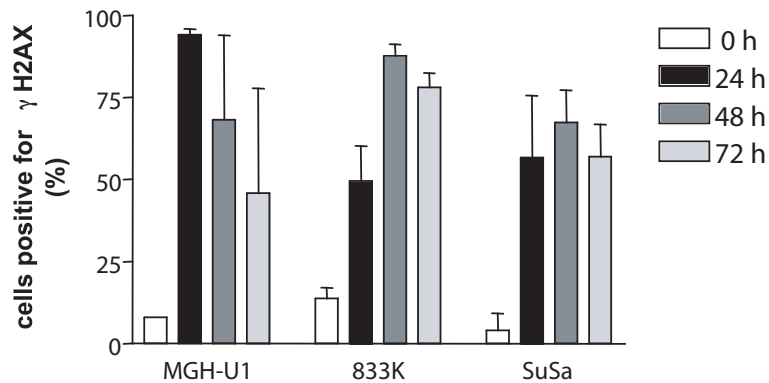

Supplement: MOESM2 [file 9554768]
